# Supplementary material for: Characterization of sea buckthorn polysaccharides and the analysis of its regulatory effect on the gut microbiota imbalance induced by cefixime
Source: Research Square preprint supplement (doi:10.21203/rs.3.rs-2103825/v1), 2022-10-03
Supplement: Supplementary file 1 [file 68a81074cb1462feead3b6a1.docx]

SUPPLEMENTARY MATERIAL

*2.1. Materials and reagents*

Sea buckthorn (*Hippophae rhamnoides L.*) was purchased from Aikang Sea-buckthorn Products Co., Ltd (Dingxi, Gansu province, China) and stored at -18 ℃ until use. The cefixime was purchased from the MCE Company (New Jersey, USA). The saccharide and acid standards were obtained from Sigma-Aldrich (Shanghai, China). All other chemicals and reagents were of analytical grade and obtained from commercial suppliers.

*2.2. The extraction, isolation, and purification of the polysaccharides*

The sea buckthorn berries were washed, crushed, and filtered, after which the collected pomace was dried at 70 ℃. The dried sea buckthorn pomace was milled, passed through a 40-mesh sieve, and stored at room temperature for subsequent use. The dried sea buckthorn powder was defatted overnight with 85% ethanol at room temperature to remove most of the alcohol-soluble impurities. After filtration, the residues were extracted with distilled water at a solid-liquid ratio of 1:30 (g/mL), an ultrasonic time of 45 min, and ultrasonic power of 100 W using an ultrasound machine (Scientz-IID, NingBo Xinzhi Biological Polytron Technologies Inc., China) according to pre-experiments. After extraction, suction filtration was performed twice, and the supernatant was collected and concentrated to a quarter of the original volume via rotary evaporation at 70 ℃ using a rotary evaporator (Eyela N-1300V-WB, Tokyo Rikakikai Co. Ltd, Tokyo, Japan). The sea buckthorn concentrate was precipitated with four times (v/v) ethanol for 12 h at 4 ℃ and centrifuged at 4000 rpm for 15 min using a TD-6M bench-top centrifuge (Sichuan Shuke Instrument Co., Ltd., China). The Sevag method was used to remove the proteins from the crude polysaccharide (cSPs) mixture. The process was repeated three times [1], after which the supernatant was collected and lyophilized for 24 h to obtain the cSPs, which were used for the subsequent animal experiments.

The purification was performed according to a method described by Zhu, et al. [2] with some modifications. The cSPs solution (1 mg/mL) was loaded on a SephadexG-100 column (500×20 mm) and eluted with deionized water at a flow rate of 6 drops/min. The obtained elute (1 mL/tube) was collected automatically, and the polysaccharide content was analyzed using the phenol-sulfuric acid colorimetric method.

*2.3. Structural analysis of the SPs*

*2.3.1. Measurement of the molecular weight (Mw)*

The Mw of the SPs was measured via ultra-performance liquid chromatography (UPLC) coupled with an ACQUITY UPLC H-Class apparatus (Waters, Milford, MA, USA) equipped with a TSK-GEL G4000PQxl column (TOSOH Co., Japan), and a refractive index detector (RID) [3]. Next, 20 μL of the sample solution (1.0 mg/mL) was passed through a 0.22 μm filter and injected into the UPLC at a flow rate of 0.6 mL/min, and column and RID temperatures of 30 ℃ and 35 ℃, respectively. The standard polysaccharide curve was established according to standard dextran with a known Mw (2.0×106, 5.0×105, 7.0×104, 4.0×104, and 1.0×104 Da), with the retention time of the standard as the abscissa and the logarithm of the Mw (lg Mw) as the ordinate: y=-0.3441x+9.2771 (*R*2=0.9912). The Mw of the SPs was estimated based on the above calibration curve.

*2.3.2. Monosaccharide composition analysis*

The monosaccharide composition was estimated using high-performance liquid chromatography (HPLC) according to a method described by Zeng, et al. [4], with some modifications. Here, 5 mg of the SPs was hydrolyzed using 1 mL of 2 M trifluoroacetic acid (TFA) at 110 ℃ for 3 h, after which the hydrolysate was cooled to room temperature and blown dry with pure nitrogen. This step was repeated three times to remove the TFA. The hydrolysate was mixed with 200 μL of a 0.5 M 1-phenyl-3-methyl-5-pyrazolone (PMP)-methanol solution and 200 μL of 0.3 M NaOH to react at 70 ℃ for 60 min, after which the reaction mixtures were neutralized with 0.3 M HCl. The product was then extracted three times with chloroform, while the aqueous layer was collected and passed through a 0.22 μm membrane filter. The determination was performed at 25 ℃ via HPLC (LC-20A, Shimadzu, Tokyo, Japan) equipped with a ZORBAX Carbohydrate Analysis Column (5 μm, 4.6×250 mm, Agilent, San Francisco, USA). The elution flow rate and injection volume were 1 mL/min and 25 μL, respectively. Mixed standard monosaccharides were also subjected to this treatment.

*2.3.3. FT-IR spectrometry*

Here, 2 mg of the SPs was ground with appropriate KBr quantities and pressed into a transparent flake. The FT-IR spectrum was obtained using a Nicolet 380 FT-IR spectrophotometer (Thermo Co., USA) and recorded at 4000-400 cm-1.

*2.3.4. Scanning electron microscopy (SEM)*

The dried SPs were immobilized on a round metal sample table and sputtered with gold powder at a thickness of 100 nm under reduced pressure. The sample was observed at different magnifications using a COXEM EM-30 Plus scanning electron microscope (COXEM Co., Ltd, Korea) at an accelerating voltage of 20 kV.

*2.4. Animal experiments*

*2.4.1. Animal experimental design*

Thirty SPF-grade female mice (18 g - 22 g) were housed in standardized conditions for 2 d and randomly divided into three groups, with ten mice in each group. The mice were fed a normal diet. Two groups were gavaged with 375 mg/(kg·D) cefixime, while one group was gavaged with the same dose of standard saline as the normal control group (CON). After 14 d of gavage, the feces of the mice were collected to verify the success of the modeling, after which the three groups were fed a normal diet. The two groups treated with cefixime were gavaged with 400 mg/kg of body weight of cSPs or the same dose of normal saline for 7 d and labeled the SPs group (SPs) and natural recovery group (NR). During the gavage period, the mental states and weight changes of the mice were monitored. After 7 d of gavage, all the experimental mice were subjected to experiments to promote defecation, after which six mice were randomly selected from each group to collect feces for biological analysis.

*2.4.2. Determination of the body weight and colon length*

The body weights of the mice in each group were measured once a week throughout the experiment. After 7 d of gavage, the mice were sacrificed, and the lengths of the colons were measured immediately.

*2.4.3. Determination of the SCFAs*

The levels of the SCFAs were determined using a method described by Liu, et al. [5] with slight modifications. An appropriate amount of feces was placed in a 2 mL centrifuge tube, after which 0.05 mL 15% phosphoric acid, 0.1 mL of a 125 μg/mL internal standard (isocaproic acid) solution, and 0.4 mL ether were added. The solution was homogenized for 1 min using a blender (Vortex Mixer, QL-866, China). The mixture was centrifuged at 12000 rpm for 10 min (4 ℃), after which the supernatant was collected for subsequent experiments. The same method was used to prepare the standard SCFA solution.

The SCFAs were analyzed using GC-MS with GCMS-QP2020 NX (Shimadzu, Kyoto, Japan) and an Agilent HP-INNOWAX, 30 m × 0.25 mm ID × 0.25 μm column. The parameter settings included an injection port temperature of 250 ℃, an ion source temperature of 300 ℃, and a transmission line temperature of 250 ℃. The initial temperature of the instrument was 90 ℃, which was increased to 120 ℃ at a heating rate of 10 ℃/min. The temperature was further increased to 150 ℃ at 5 ℃/min, and finally to 250 ℃ at 5 ℃/min, where it was maintained for 2 min. Helium was used as a carrier gas, while the carrier gas flow rate was 1 mL/min. EI was used as the ionization mode at 70 eV electron energy.

*2.4.4. 16S rRNA gene and bioinformatics analysis*

The total bacterial DNA was extracted from 0.1 g fecal samples using a ZymoBIOMICS DNA Miniprep Kit according to the instructions of the manufacturer. The bacterial 16S rRNA V4 hypervariable region (515F, 5’-GTGYCAGCMGCCGCGGTAA-3’; 806R, 5’-GGACTACHVGGGTWTCTAAT-3’) was selected as a target and amplified using a PCR detection system (Applied Biosystems® PCR System 9700) [6], while the amplicons were sequenced via an Illumina MiSeq platform. The taxonomy and beta diversity of gut microbial sequencing were analyzed using QIIME 1.9.1 software, and the statistics and cluster analysis of the operational taxonomic units (OTU) were performed with the Usearch 10.0.240 and Uparse algorithm, respectively.

*2.5 Statistical analysis*

The statistical analysis was performed using Excel (Microsoft Corporation, Redmond, Washington) and SPSS 21.0 software (SPSS Inc., Chicago, USA), while the data were evaluated with one-way analysis of variance (ANOVA) followed by Tukey’s multiple range tests. A *p* < 0.05 was considered statistically significant. The microbiological analyses were performed using the R statistical software 3.6.0 (MathSoft Int, UK).

1. Yao, Y. L., C. Shu, G. Feng, Q. Wang, Y. Y. Yan, Y. Yi, H. X. Wang, X. F. Zhang, and L. M. Wang. "Polysaccharides from Pyracantha Fortuneana and Its Biological Activity." Int J Biol Macromol 150 (2020): 1162-74.

2. Zhu, Z. Y., Y. Luo, G. L. Dong, Y. Y. Ren, L. J. Chen, M. Z. Guo, X. T. Wang, X. Y. Yang, and Y. Zhang. "Effects of the Ultra-High Pressure on Structure and Alpha-Glucosidase Inhibition of Polysaccharide from Astragalus." Int J Biol Macromol 87 (2016): 570-6.

3. Sun, Y., J. Tang, X. Gu, and D. Li. "Water-Soluble Polysaccharides from Angelica Sinensis (Oliv.) Diels: Preparation, Characterization and Bioactivity." Int J Biol Macromol 36, no. 5 (2005): 283-9.

4. Zeng, H., S. Miao, B. Zheng, S. Lin, Y. Jian, S. Chen, and Y. Zhang. "Molecular Structural Characteristics of Polysaccharide Fractions from Canarium Album (Lour.) Raeusch and Their Antioxidant Activities." J Food Sci 80, no. 11 (2015): H2585-96.

5. Liu, C., P. Du, Y. Guo, Y. Xie, H. Yu, W. Yao, Y. Cheng, and H. Qian. "Extraction, Characterization of Aloe Polysaccharides and the in-Depth Analysis of Its Prebiotic Effects on Mice Gut Microbiota." Carbohydr Polym 261 (2021): 117874.

6. Niu, Qing, Pinghua Li, Shuaishuai Hao, Yeqiu Zhang, Sung Woo Kim, Huizhi Li, Xiang Ma, Shuo Gao, Lichun He, and WangJun Wu. "Dynamic Distribution of the Gut Microbiota and the Relationship with Apparent Crude Fiber Digestibility and Growth Stages in Pigs." Scientific reports 5, no. 1 (2015): 1-7.

**Figure S1** The elution curve of SPs on Sephadex G-100 column

**Figure S2** The UV spectrum analysis of SPs
